# Supplementary material
Source: HighWire-hosted journal article supplement (https://ard.bmj.com/content/81/1/143)
Supplement: inline-supplementary-material-1 [file inline-supplementary-material-1.pdf]

Supplementary Table 1. Description of patients with hospitalized COVID-19.

| Patient                                      | 1                                  | 2                                      | 3                                                        | 4                                                        | 5                           | 6                                      | 7                                                                             | 8                                           | 9                                                                 | 10                                 |
|----------------------------------------------|------------------------------------|----------------------------------------|----------------------------------------------------------|----------------------------------------------------------|-----------------------------|----------------------------------------|-------------------------------------------------------------------------------|---------------------------------------------|-------------------------------------------------------------------|------------------------------------|
| <b>Gender</b>                                | Male                               | Male                                   | Female                                                   | Male                                                     | Female                      | Female                                 | Female                                                                        | Male                                        | Male                                                              | Female                             |
| <b>Age (years)</b>                           | 67                                 | 74                                     | 52                                                       | 46                                                       | 67                          | 49                                     | 81                                                                            | 90                                          | 81                                                                | 63                                 |
| <b>Biologic treatment</b>                    | Rituximab                          | Rituximab                              | Rituximab                                                | Rituximab                                                | Rituximab                   | Rituximab                              | Rituximab                                                                     | Rituximab                                   | Rituximab                                                         | Infliximab                         |
| <b>Associated csDMARDs</b>                   | No                                 | MTX 10 mg/sem (Oral)                   | Cellcept 3g/day                                          | No                                                       | MTX 15 mg/sem (SC)          | MTX 15 mg/sem (SC)                     | No                                                                            | No                                          | No                                                                | MTX 25 mg/sem (SC)                 |
| <b>Associated glucocorticoids</b>            | No                                 | Prednisone 2 mg/day                    | Prednisone 7 mg/day                                      | No                                                       | No                          | No                                     | Prednisone 3.5 mg/day                                                         | No                                          | Prednisone 20 mg/day                                              | No                                 |
| <b>IAs</b>                                   | Rheumatoid arthritis               | Rheumatoid arthritis                   | Necrotizing myositis                                     | Rheumatoid arthritis                                     | Rheumatoid arthritis        | Rheumatoid arthritis                   | Rheumatoid arthritis                                                          | Rheumatoid arthritis                        | Granulomatosis with polyangiitis                                  | Spondyloarthritis                  |
| <b>IAs disease activity before COVID-19</b>  | DAS28-CRP= 1.74 (remission)        | DAS28-CRP= 3.18 (low disease activity) | NA but in a control state                                | DAS28-CRP= 1.64 (remission)                              | DAS28-CRP= 1.48 (remission) | DAS28-CRP= 5.3 (high disease activity) | DAS28-CRP= 4.73 (moderate disease activity)                                   | DAS28-CRP= 3.35 (moderate disease activity) | NA but in a controlled state                                      | ASDAS= 3.7 (high disease activity) |
| <b>Known risk factor for severe COVID-19</b> | Ischemic cardiopathy, hypertension | Diabetes, rhythmic cardiopathy         | Obesity, chronic lung disease (interstitial pneumopathy) | Chronic lung disease (bronchiolitis, pulmonary embolism) | No                          | No                                     | Hypertension, chronic lung disease (obstructive sleep apnea-hyponea syndrome) | Diabetes, hypertension, pacemaker           | Cerebrovascular event, chronic lung disease (alveolar hemorrhage) | Cerebrovascular event, obesity     |
| <b>BMI (kg/m<sup>2</sup>)</b>                | 26.1                               | 34.5                                   | 47.0                                                     | 20.0                                                     | 24.1                        | 17.6                                   | 23.6                                                                          | 21.7                                        | 24.7                                                              | 40.8                               |
| <b>Date of COVID-19</b>                      | December 2020                      | November 2020                          | October 2020                                             | August 2020                                              | April 2020                  | October 2020                           | March 2020                                                                    | December 2020                               | November 2020                                                     | April 2020                         |
| <b>Hospitalization</b>                       | Yes                                | Yes                                    | Yes                                                      | Yes                                                      | Yes                         | Yes                                    | Yes                                                                           | Yes                                         | Yes                                                               | Yes                                |
| <b>Length of hospitalization (days)</b>      | 17                                 | 19                                     | 12                                                       | 22                                                       | 66                          | 10                                     | 48                                                                            | 18                                          | 27                                                                | 15                                 |
| <b>Oxygenation</b>                           | Yes                                | Yes                                    | Yes                                                      | Yes                                                      | Yes                         | Yes                                    | No                                                                            | No                                          | Yes                                                               | Yes                                |
| <b>Admission in an ICU</b>                   | No                                 | No                                     | No                                                       | No                                                       | Yes                         | No                                     | No                                                                            | No                                          | No                                                                | No                                 |
| <b>Mechanical oxygenation</b>                | No                                 | No                                     | No                                                       | No                                                       | Yes                         | No                                     | No                                                                            | No                                          | No                                                                | No                                 |

| Specific COVID-19 treatment                                                     | Dexamethasone | No       | No                 | Remdesivir and convalescent plasma | No            | Convalescent plasma | No        | No       | Dexamethasone and convalescent plasma | No      |
|---------------------------------------------------------------------------------|---------------|----------|--------------------|------------------------------------|---------------|---------------------|-----------|----------|---------------------------------------|---------|
| <b>Death</b>                                                                    | No            | No       | No                 | No                                 | No            | No                  | No        | No       | No                                    | No      |
| <b>Recovery</b>                                                                 | Yes           | Yes      | Yes                | Yes                                | Yes           | Yes                 | Yes       | Yes      | Yes                                   | Yes     |
| <b>Time between last infusion and COVID-19 (months)</b>                         | 3             | 4        | 2                  | 1                                  | 5             | 1                   | 4         | 5        | 5                                     | 2       |
| <b>IgG level (g/L) at the time of COVID-19 [last IgG level before COVID-19]</b> | NA [10.1]     | NA [6.6] | IV supplementation | Ig 7.4 [12.9]                      | 6.1 [5.6]     | 11.2 [11.9]         | 6.4 [7.4] | NA [9.1] | 4.5 [NA]                              | NA [NA] |
| <b>Lymphocytes count (B/TCD4+/TCD8+)*</b>                                       | 0 / 437 / 287 | NA       | NA                 | 1 / 303 / 144                      | 0 / 607 / 175 | 1 / 282 / 96        | NA        | NA       | 0 / 87 / 266                          | NA      |

**IA, inflammatory arthritides; BMI, Body Mass Index; ICU, intensive care unit; MTX, methotrexate; NA not available**

The median delay from last infusion to confirmation of severe COVID-19 was 3.5 months (IQR [1.8-5.0]). No death was reported, but one patient was admitted to intensive care. Patients were hospitalized for a median of 18.5 days (IQR [14-32]). A minority of patients received specific COVID-19 treatment (n=6), 3 received convalescent plasma, 2 received dexamethasone and 1 received remdesivir. At last follow-up, all patients had recovered. The last immunoglobulin G (IgG) level recorded before infection was normal for all patients (median 7.4, IQR [5.6-10.1] g/L). In patients for whom IgG level was measured at the time of COVID-19, IgG level was at the lower limit of normal (median 6.4, IQR [5.3-9.3] g/L). B-cell counts were available for 5 patients at the time of COVID-19, all of whom presented complete B-cell depletion.

**Supplementary Table 2. Univariate and multivariate models assessing the association between the occurrence of moderate-to-severe COVID-19 and each variable**

| Variables                                                | Univariate OR of severe COVID (95% CrI)                          | Multivariate OR of severe COVID (95% CrI) Model #1 | Multivariate OR of moderate-to-severe COVID (95% CrI) Model #2 |
|----------------------------------------------------------|------------------------------------------------------------------|----------------------------------------------------|----------------------------------------------------------------|
| <b>bDMARDs (RTX vs Other bDMARDs)</b>                    | <b>6.6 (1.7-35.0)</b><br>Pr (OR>1) $\approx$ 1.0                 | <b>6.6 (1.3-43.0)</b>                              | <b>4.1 (1.7-10.4)</b>                                          |
| <b>Median age (years)</b>                                | 1.0 (1.0-1.1)<br>Pr (OR>1) = 0.7                                 | 1.0 (0.9 -1.1)                                     | 1.0 (0.9-1.0)                                                  |
| <b>Female</b>                                            | 0.6 (0.2-2.3)<br>Pr (OR>1) = 0.2                                 | 0.6 (0.2-2.7)                                      | 0.5 (0.2-1.0)                                                  |
| <b>IA diagnosis</b><br><i>Rheumatoid arthritis</i>       | RA vs SPA<br>0.4 (0.1-1.9)<br>Pr (OR>1) = 0.1                    | RA vs SPA<br>1.0 (0.1-7.6)                         | RA vs SPA<br>0.6 (0.1-4.0)                                     |
| <i>Spondyloarthritis (including psoriatic arthritis)</i> | RA vs Other<br>2.8 (0.5-12.3)<br>Pr (OR>1) = 0.9                 | RA vs Other<br>2.7 (0.4-15.5)                      | RA vs Other<br>2.4 (0.4-12.3)                                  |
| <i>Other*</i>                                            |                                                                  |                                                    |                                                                |
| <b>Comorbidities</b>                                     |                                                                  |                                                    |                                                                |
| <i>Cardiovascular disease</i>                            | <b>3.7 (1.0-16.9)</b><br>Pr (OR>1) $\approx$ 1.0                 | 3.4 (0.8-16.8)                                     | 2.7 (1.2-5.7)                                                  |
| <i>Cerebrovascular disease</i>                           | 2.0 (0.9-4.6)<br>Pr (OR>1) = 0.9                                 | 0.5 (0.0-5.3)                                      | 0.6 (0.0-5.4)                                                  |
| <i>Chronic lung disease</i>                              | 2.4 (0.5-9.3)<br>Pr (OR>1) = 0.9                                 | 1.4 (0.2-6.3)                                      | 2.1 (1.0-4.4)                                                  |
| <i>Diabetes</i>                                          | 2.1 (0.4-8.5)<br>Pr (OR>1) = 0.8                                 | 1.4 (0.2-6.9)                                      | 1.7 (0.3-8.0)                                                  |
| <b>BMI (kg/m<sup>2</sup>)</b>                            | Normal BMI vs BMI > 25<br>0.2 (0.0-1.7)<br>Pr (OR>1) = 0.1       | Normal BMI vs BMI > 25<br>0.2 (0.0-1.5)            | Normal BMI vs BMI > 25<br>0.2 (0.0-1.7)                        |
|                                                          | Normal BMI vs BMI > 30<br>0.7 (0.1-3.9)<br>Pr (OR>1) = 0.3       | Normal BMI vs BMI > 30<br>0.5 (0.1-3.6)            | Normal BMI vs BMI > 30<br>0.5 (0.1-3.1)                        |
| <b>Treatments</b>                                        |                                                                  |                                                    |                                                                |
| <i>Conventional synthetic DMARDs</i>                     | 0.8 (0.2-3.1)<br>Pr(OR>1)= 0.4                                   | 1.0 (0.2-4.3)                                      | 0.5 (0.3-1.2)                                                  |
| <i>Other immunosuppressive agents</i>                    | <b>3.0(1.4-6.6)</b><br>Pr(OR>1) $\approx$ 1.0                    | 5.2 (0.6-39.5)                                     | <b>2.2 (1.1-4.5)</b>                                           |
| <i>Glucocorticoids</i>                                   | No Steroids vs. 0 to 10 mg/day<br>2.9 (0.6-12.9)<br>Pr(OR>1)=0.9 | No steroids vs 0 to 10 mg/day<br>1.6 (0.3-8.3)     | No steroids vs 0 to 10 mg/day<br>1.6 (0.3-8.2)                 |
|                                                          | No Steroids vs. > 10mg/day<br>3.4 (0.3-25.1)<br>Pr(OR>1)=0.8     | No steroids vs > 10 mg/day<br>1.7 (0.2-15.0)       | No steroids vs > 10 mg/day<br>1.9 (0.2-15.7)                   |

Model #1: Weakly informative prior (specifying that  $0.05 < OR_x < 20$  a priori)

Model #2: Taking into account prior according to a recent publication by Strangfeld et al. [3] (same as Table 1)

Moderate-to-severe COVID-19 was defined as following: patients who had SpO<sub>2</sub> <94% on room air at sea level and who required oxygen.
